# Supplementary material for: Solar ultraviolet radiation is necessary to enhance grapevine fruit ripening transcriptional and phenolic responses
Source: PubMed Central journal article supplement (PMC4099137; doi:10.1186/1471-2229-14-183), 2014-07-09
Supplement: 1471-2229-14-183-S3.pdf [file 1471-2229-14-183-S3.pdf]

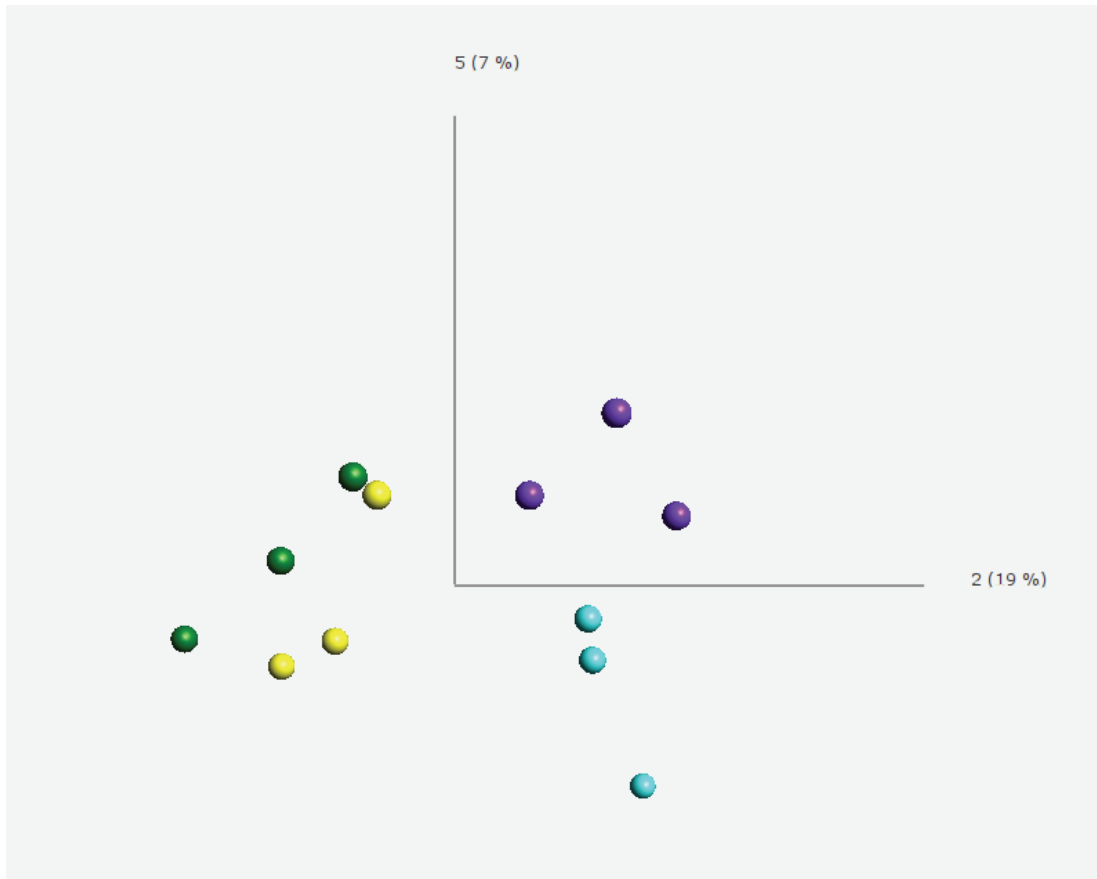

**Figure S1. Principal component analysis of RMA normalized expression data in Tempranillo berry skin.** Component 2 (explaining 19% of variance) and component 5 (7% of variance), reflecting berry density and radiation treatment effects, respectively, are shown. Green, UV-transmitting filter (FUV+) and 23 °Brix; Yellow, UV-blocking filter and 23 °Brix; Purple, FUV+ filter and 26 °Brix; Blue, FUV- filter and 26 °Brix.
