# Supplementary material for: Solar ultraviolet radiation is necessary to enhance grapevine fruit ripening transcriptional and phenolic responses
Source: PubMed Central journal article supplement (PMC4099137; doi:10.1186/1471-2229-14-183), 2014-07-09
Supplement: 1471-2229-14-183-S6.pdf [file 1471-2229-14-183-S6.pdf]

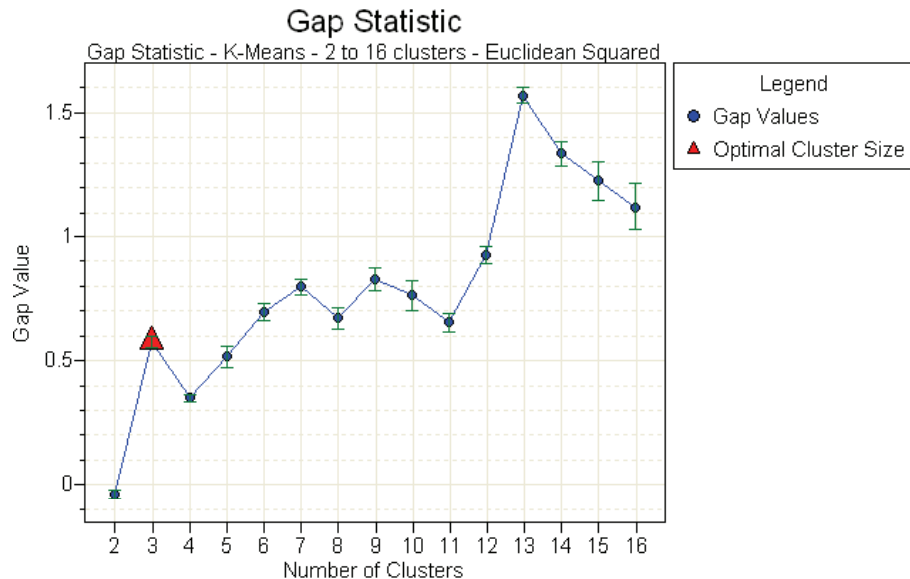

**Figure S2. Gap statistic analysis of UV-differentially expressed genes in Tempranillo berry skin.** The Gap score for each cluster number (between 2 and 16) using k-means clustering and Euclidean squared metrics is shown. The resulting optimum number of clusters is highlighted by a red triangle.
